# Supplementary material for: Continuous wave pumped single-mode nanolasers in inorganic perovskites with robust stability and high quantum yield
Source: Royal Society of Chemistry journal article supplement (doi:10.1039/c8nr03830a), 2018-01-01
Supplement: c8nr03830a1.pdf [file c8nr03830a1.pdf]

## Electronic Supplementary Information for

### Continuous wave Pumped Nanolasers of Single-mode in Inorganic Perovskites with Robust Stability and High Quantum Yield

Li Jiang,<sup>a</sup> Renming Liu,<sup>a</sup> Rongling Su,<sup>a</sup> Ying Yu,<sup>a</sup> Haofei Xu,<sup>a</sup> Yuming Wei,<sup>a</sup> Zhang-Kai Zhou,<sup>\*a</sup> and Xuehua Wang<sup>a</sup>

<sup>a</sup> *State Key Laboratory of Optoelectronic Materials and Technologies, School of Physics, Sun Yat-sen University, Guangzhou 510275, China. L. Jiang and R. Liu contributed equally to this work.*

*\*Correspondence and requests for materials should be addressed to Z.K.Z. (Email: zhouzhk@mail.sysu.edu.cn)*

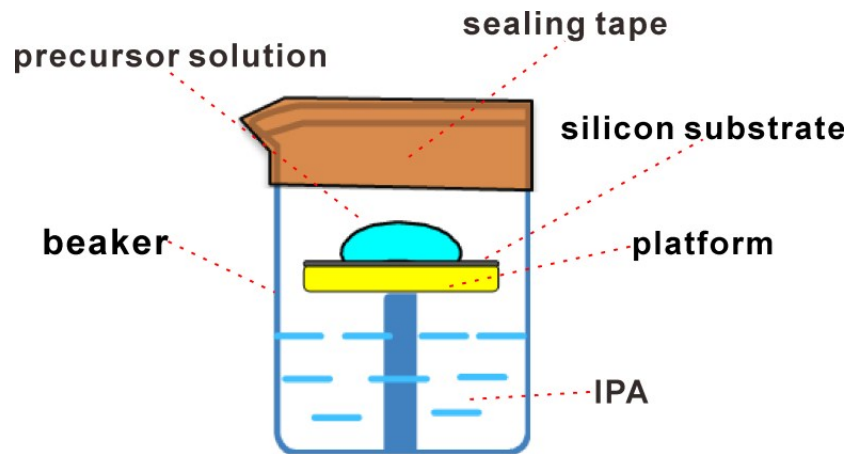

Fig. S1 Scheme of the beaker used for the growth of CsPbX<sub>3</sub> NWs using the gas-liquid transfer recrystallization method

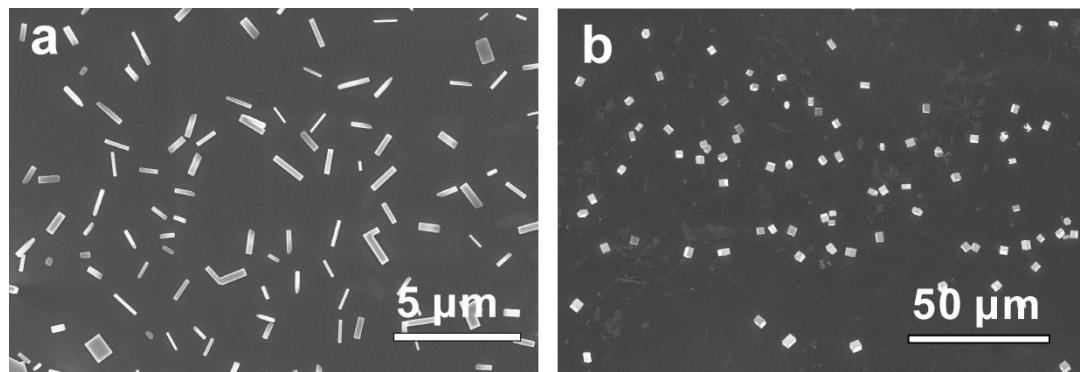

Fig. S2 The SEM photographs of CsPbBr<sub>3</sub> crystals from different volume of IPA (in a 100-mL beaker), (a) 50 mL, (b) 10 mL.

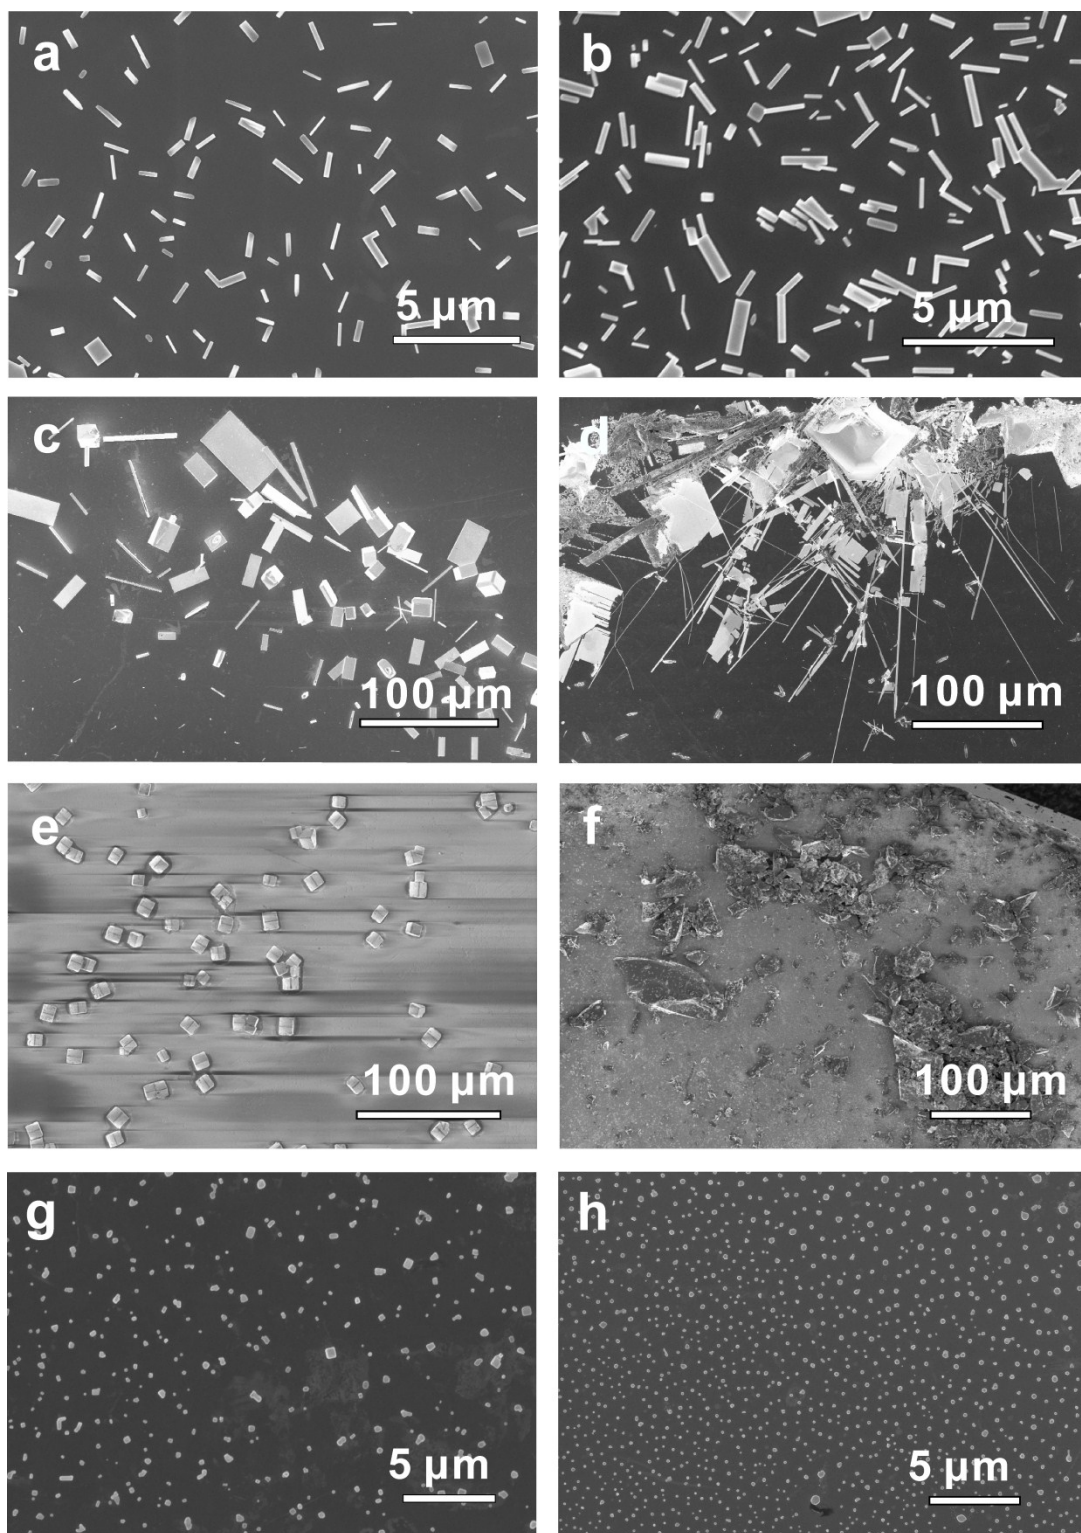

Fig. S3 The SEM photographs of CsPbBr<sub>3</sub> crystals from different vapor/atmosphere: (a) isopropanol, (b) n-propanol, (c) butyl alcohol, (d) cyclohexane, (e) dichloromethane, (f) ethanol, (g) Air, (h)nitrogen.

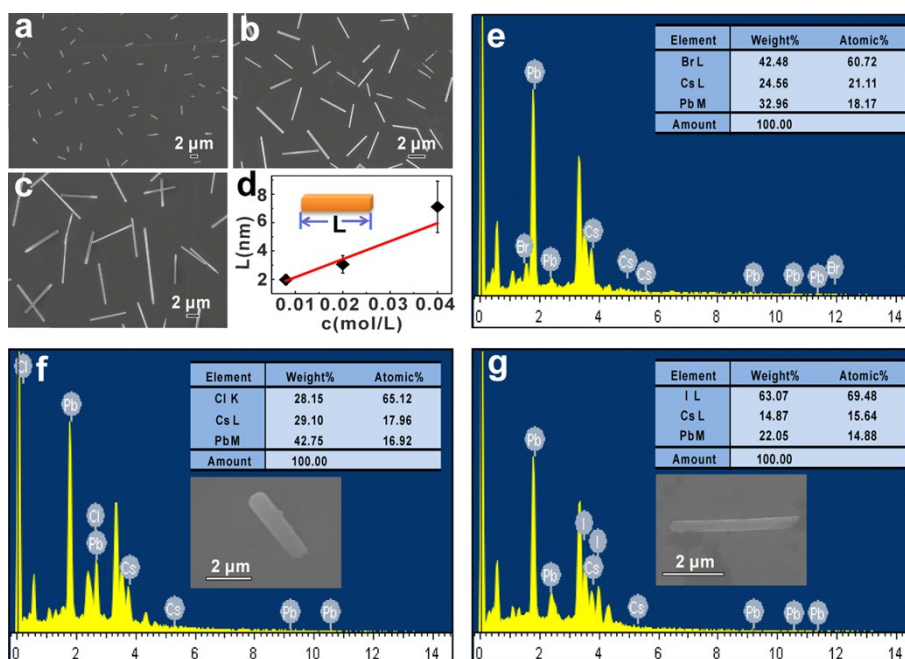

Fig. S4 (a-d) The morphological features (SEM images) of CsPbBr<sub>3</sub> NWs with different length. The length of the nanowires can be adjusted from 2~10μm, by controlling the precursor concentration. (e) A representative EDS spectrum of a single CsPbBr<sub>3</sub> NW on a silicon substrate. The inset shows quantitative elemental analysis of the corresponding EDS. (f) A representative EDS spectrum of a single CsPbCl<sub>3</sub> NW on a silicon substrate. The inset shows quantitative elemental analysis and SEM image of the corresponding EDS. (g) A representative EDS spectrum of a single CsPbI<sub>3</sub> NW on a silicon substrate. The inset shows quantitative elemental analysis and SEM image of the corresponding EDS, demonstrating Cs, Pb and X (Cl, Br, I) components with a quantified ratio of 1:1:3.

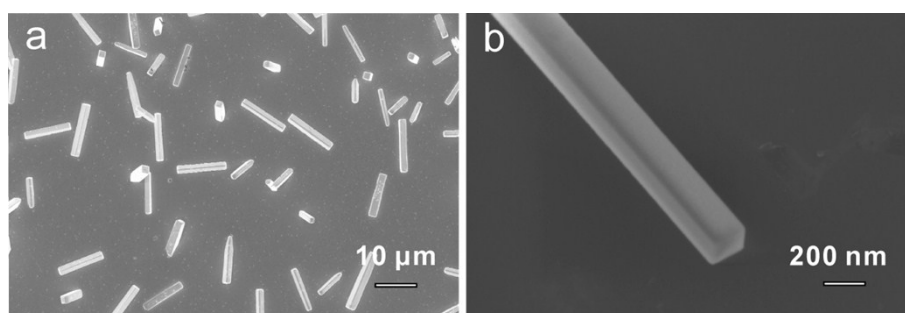

Fig. S5 More details about the morphological and cross section of CsPbBr<sub>3</sub> NWs

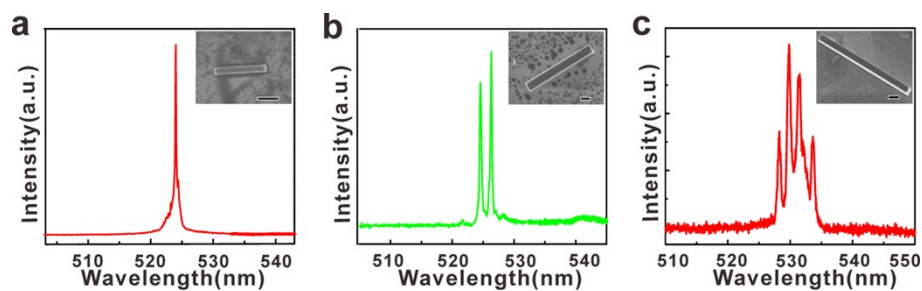

Fig. S6 Different lasing behaviors of a single perovskite nanowire. (a) single mode, (b) double-mode and (c) multi-mode. The undefined scale bar indicates 1  $\mu\text{m}$ .

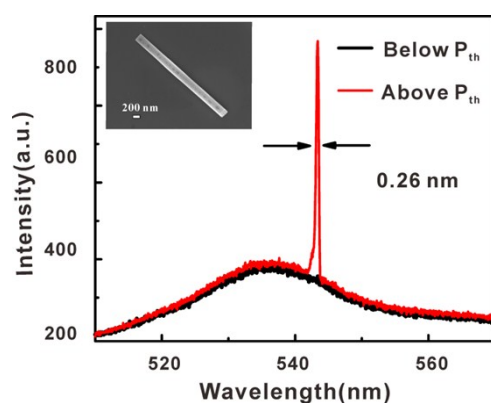

Fig. S7 Femtosecond-pumped PL intensities with below (black line) and above  $P_{th}$  (red line) from a single  $\text{CsPbBr}_3$  NW, showing a linewidth of 0.26 nm..

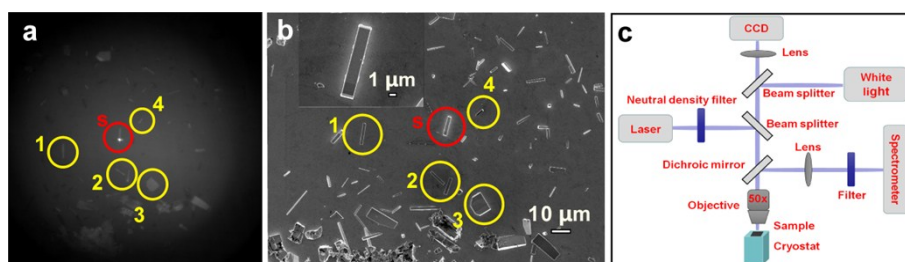

Fig. S8 Low temperature measurements of single nanowire. (a) Optical micrographs; (b) and the corresponding SEM image, inset: the magnification SEM images; (c) Schematic sketch of experimental system configuration for lasing measurements on a single nanowire at low temperature. By comparing the optical micrograph (a) and its corresponding SEM image (b), one can identify a specific nanowire that has been measured (marked by red cycle). The well-controlled laser beams (laser spot, the diameter is  $\sim 2 \mu\text{m}$ ) can also be clearly observed in the optical image (a), which demonstrates the excitation of a single nanowire.

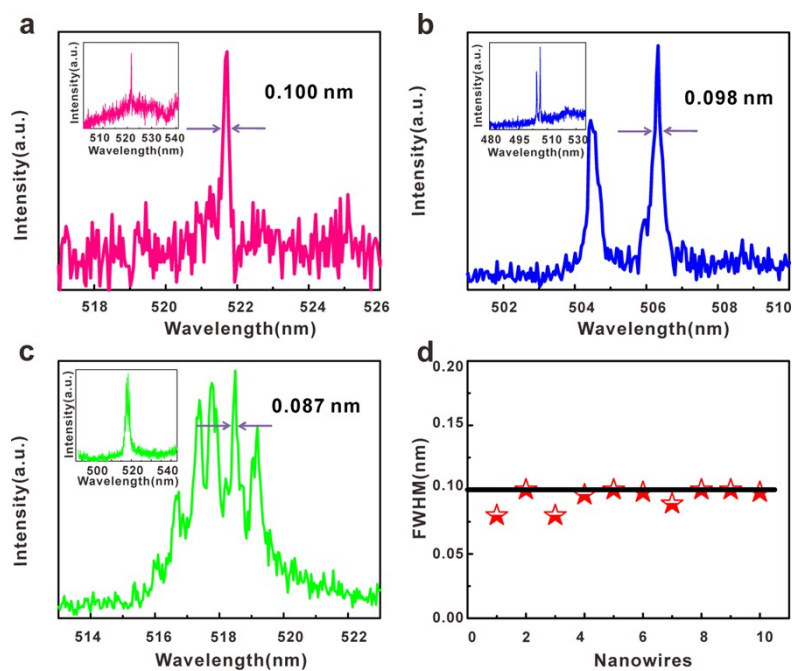

Fig. S9 The linewidth of CsPbBr<sub>3</sub> NWs lasing with single mode (a), double-mode (b) and multi-mode (c). (d) The corresponding statistical linewidth of lasing spectra.

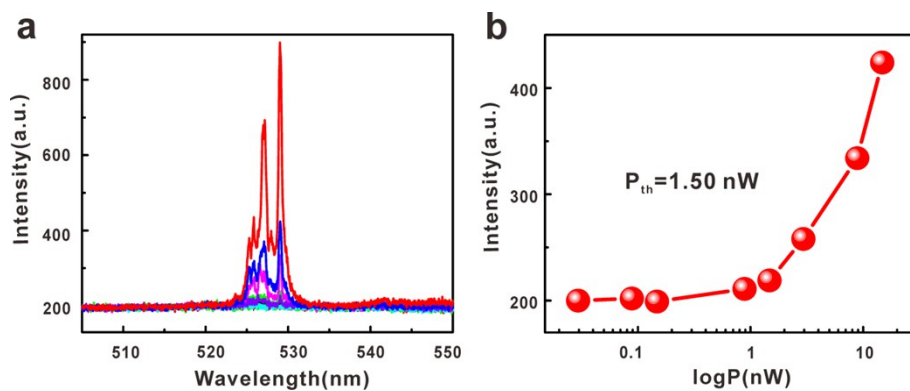

Fig. S10 Multi-mode lasing actions of a single CsPbBr<sub>3</sub> NW after reserving in clean room for over one year. (a) The fluence-dependent of lasing spectra from a single CsPbBr<sub>3</sub> NW with multi-mode lasing. (b) The fluence-dependent of the single mode lasing intensity showing a threshold of 1.50 nW.

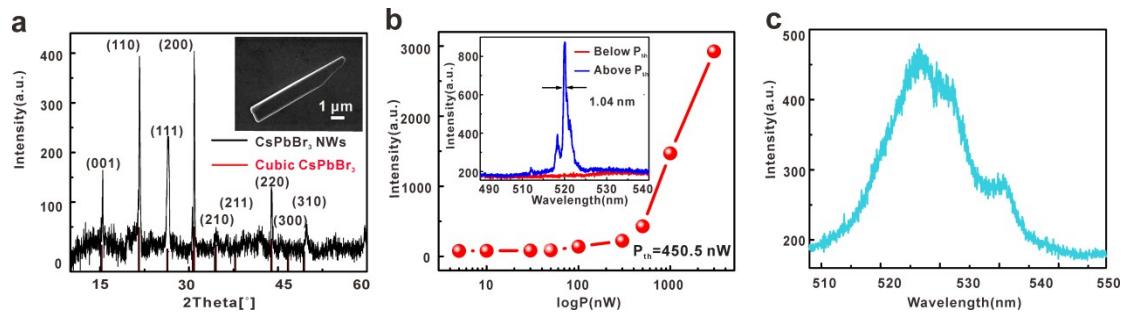

Fig. S11 Lasing reactions of CsPbBr<sub>3</sub> NW with poor crystallization. (a) XRD results and a typical SEM image of a CsPbBr<sub>3</sub> NW with poor crystallization. Such NWs are synthesized under ~30°C, which is ~8 °C higher than the suitable temperature. (b) Typical PL spectra and the fluence-dependent of lasing spectra from the single CsPbBr<sub>3</sub> NW. The lasing threshold and linewidth are respectively 300 times higher and 10 times broader than those of the CsPbBr<sub>3</sub> NWs reported in the main text. (c) The PL spectrum of the CsPbBr<sub>3</sub> NW with poor crystallization after one year preservation. No lasing action can be observed. In (b) and (c) the sample was pumped by CW laser, and the measurement temperature was 4 K.

| <b>P</b>                 | <b>A</b>               | <b>T<sub>1</sub></b><br><b>(ns)</b> | <b>T<sub>2</sub></b><br><b>(ns)</b> | <b>Bn</b>              | <b>k<sub>lasing</sub> n</b> | <b>Note</b><br><b>QY(%)</b> | <b>Lasing</b><br><b>QY (%)</b> |
|--------------------------|------------------------|-------------------------------------|-------------------------------------|------------------------|-----------------------------|-----------------------------|--------------------------------|
| <b>0.5P<sub>th</sub></b> | 0.3482×10 <sup>9</sup> | 2.45                                | --                                  | 0.0599×10 <sup>9</sup> | --                          | 15                          | --                             |
| <b>0.8P<sub>th</sub></b> | 0.3482×10 <sup>9</sup> | 2.25                                | --                                  | 0.0962×10 <sup>9</sup> | --                          | 22                          | --                             |
| <b>1.1P<sub>th</sub></b> | 0.3482×10 <sup>9</sup> | 0.59                                | 2.15                                | 0.1169×10 <sup>9</sup> | 0.4260×10 <sup>9</sup>      | 61                          | 48                             |
| <b>2.0P<sub>th</sub></b> | 0.3482×10 <sup>9</sup> | 0.57                                | 2.05                                | 0.1396×10 <sup>9</sup> | 0.5020×10 <sup>9</sup>      | 65                          | 51                             |
| <b>3.0P<sub>th</sub></b> | 0.3482×10 <sup>9</sup> | 0.49                                | 1.82                                | 0.2012×10 <sup>9</sup> | 0.7473×10 <sup>9</sup>      | 73                          | 58                             |

Table. S1 Estimated Quantum yields (QY) and lasing QY of a single CsPbBr<sub>3</sub> NWs (the data are analyzed from Fig. 3a).

$$\text{Note: } QY = \frac{\text{radiative rate}}{\text{total rate}} = \frac{Bn + k_{\text{lasing}}n}{A + Bn + k_{\text{lasing}}n} \quad (1)$$

$$\text{Lasing } QY = \frac{\text{lasing rate}}{\text{total rate}} = \frac{k_{\text{lasing}}n}{A + Bn + k_{\text{lasing}}n} \quad (2)$$
